# Supplementary material
Source: PubMed Central journal article supplement (PMC5836321)
Supplement: NIHMS944958-supplement-Title_Page.pdf [file NIHMS944958-supplement-Title_Page.pdf]

## Title page

### **Depression in Mexican Americans with Diagnosed and Undiagnosed Diabetes**

Running Title: **Depression with Diagnosed Diabetes**

Rene L. Olvera<sup>1</sup> MD, MPH, Susan P. Fisher-Hoch<sup>2</sup>, MD, Douglas E. Williamson<sup>1</sup> PhD,  
Kristina P. Vatcheva<sup>2</sup> MS, Joseph B. McCormick<sup>2</sup>, MD

#### **Authors Affiliation:**

1. The University of Texas Health Science Center at San Antonio, Department of Psychiatry, Division of Genetic Epidemiology, San Antonio, TX., U.S.A.
2. , Brownsville TX., U.S.A.

#### **Corresponding Author:**

Rene L. Olvera MD, MPH  
The University of Texas Health Science Center at San Antonio,  
Department of Psychiatry  
7703 Floyd Curl Dr.  
San Antonio., TX., 78229  
Ph. (210) 567-5490, Fax: (210) 567-5677, email: [olverar@UTHSCSA.edu](mailto:olverar@UTHSCSA.edu)

Word Count: 3,434

Tables: 4

Figures: 1

**Conflicts of Interest:** The authors have no financial conflicts of interests to disclose.

**Source of funding:** This work was supported by MD000170 P20 funded from the National Center on Minority Health and Health disparities (NCMHD), and the Centers for Clinical and Translational Science Award UL1 TR000371 from the National Center for Research Resources (NCRR).

#### **Acknowledgments**

We thank our support team for cohort recruitment database management and administrative support. We thank Valley Baptist Medical Center, Brownsville for providing us space for our Center for Clinical and Translational Science Clinical

Research Unit. We finally thank the community of Brownsville and the participants who so willingly participated in this study in their city.
